# Supplementary material for: Receptor Tyrosine Kinase KIT: Mutation-Induced Conformational Shift Promotes Alternative Allosteric Pockets
Source: MDPI journal article supplement (doi:10.3390/kinasesphosphatases1040014), 2023-09-25
Supplement: s1 [file s1]

Archive with 1 entries (1 files):
- kinasesphosphatases-2590548-supplementary.pdf
