# Supplementary material for: Receptor Tyrosine Kinase KIT: Mutation-Induced Conformational Shift Promotes Alternative Allosteric Pockets
Source: MDPI journal article supplement (doi:10.3390/kinasesphosphatases1040014), 2023-09-25
Supplement: s1 [file s1 › kinasesphosphatases-2590548-supplementary.pdf]

## **Supplementary Material**

### **Receptor Tyrosine Kinase KIT: Mutation-Induced Conformational Shift Promotes Alternative Allosteric Pockets**

Julie Ledoux, Marina Botnari and Luba Tchertanov\*

**Figures S1-S6**

**Tables S1-S2**

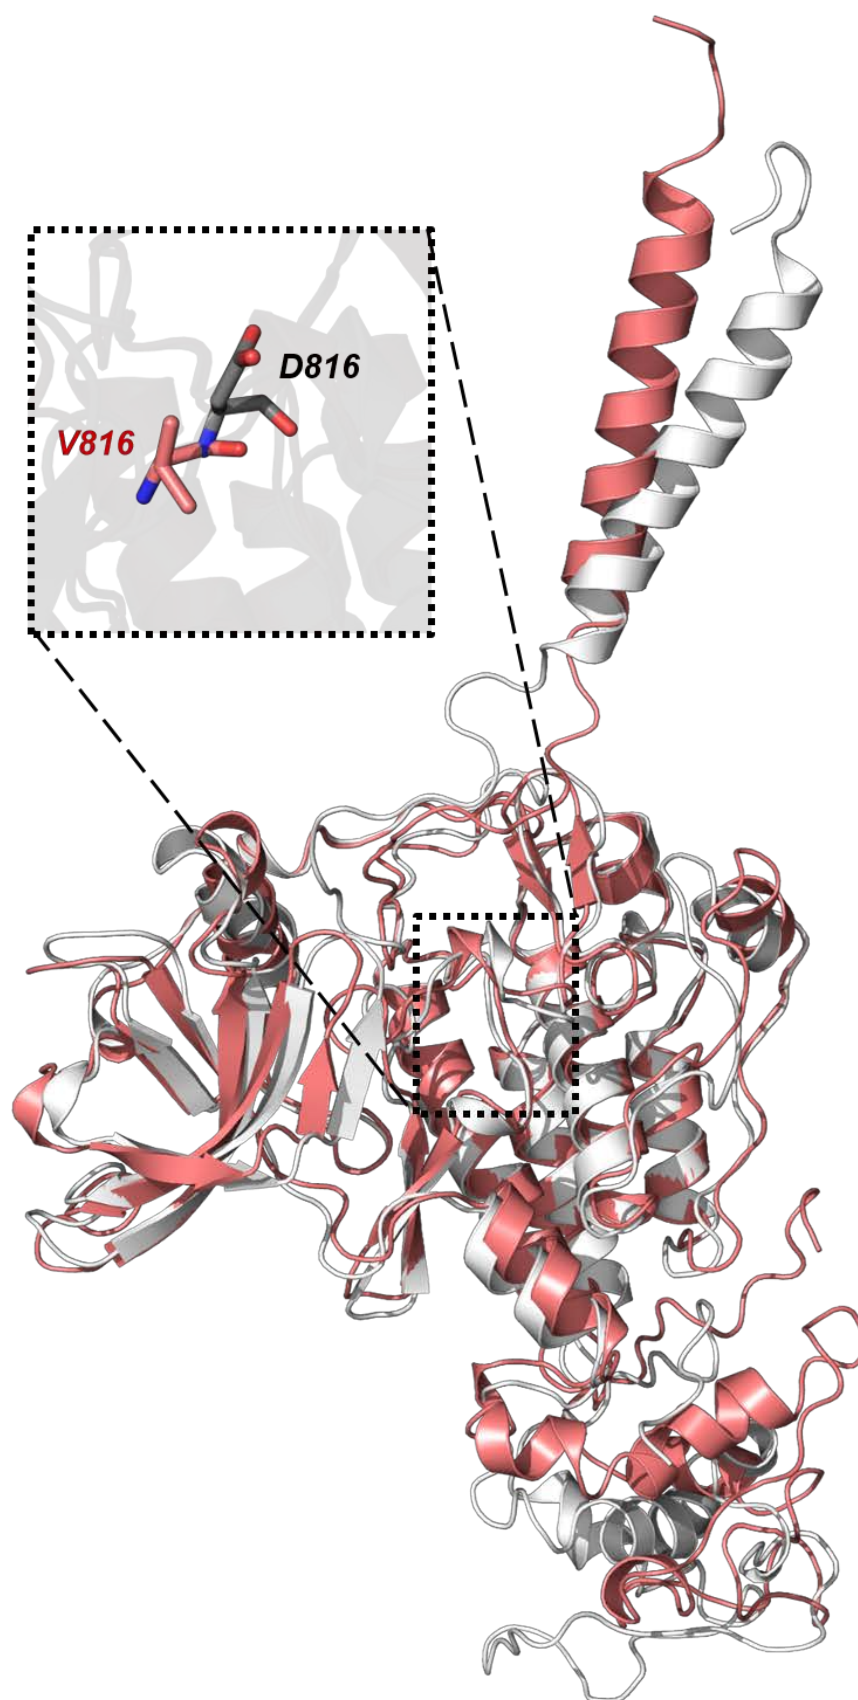

**Figure S1.** Homology modelling of KIT<sup>D816V</sup> from the KIT<sup>WT</sup> full-length cytoplasmic domain model completed by the transmembrane helix (sequence I516-R946). Superimposition of KIT<sup>WT</sup> (in grey) taken at t=2  $\mu$ s of MD simulation, and KIT<sup>D816V</sup> (in pink) taken at t = 0  $\mu$ s. RMSDs calculated on C-alpha after fitting on tyrosine kinase domain is of 6.5 Å.

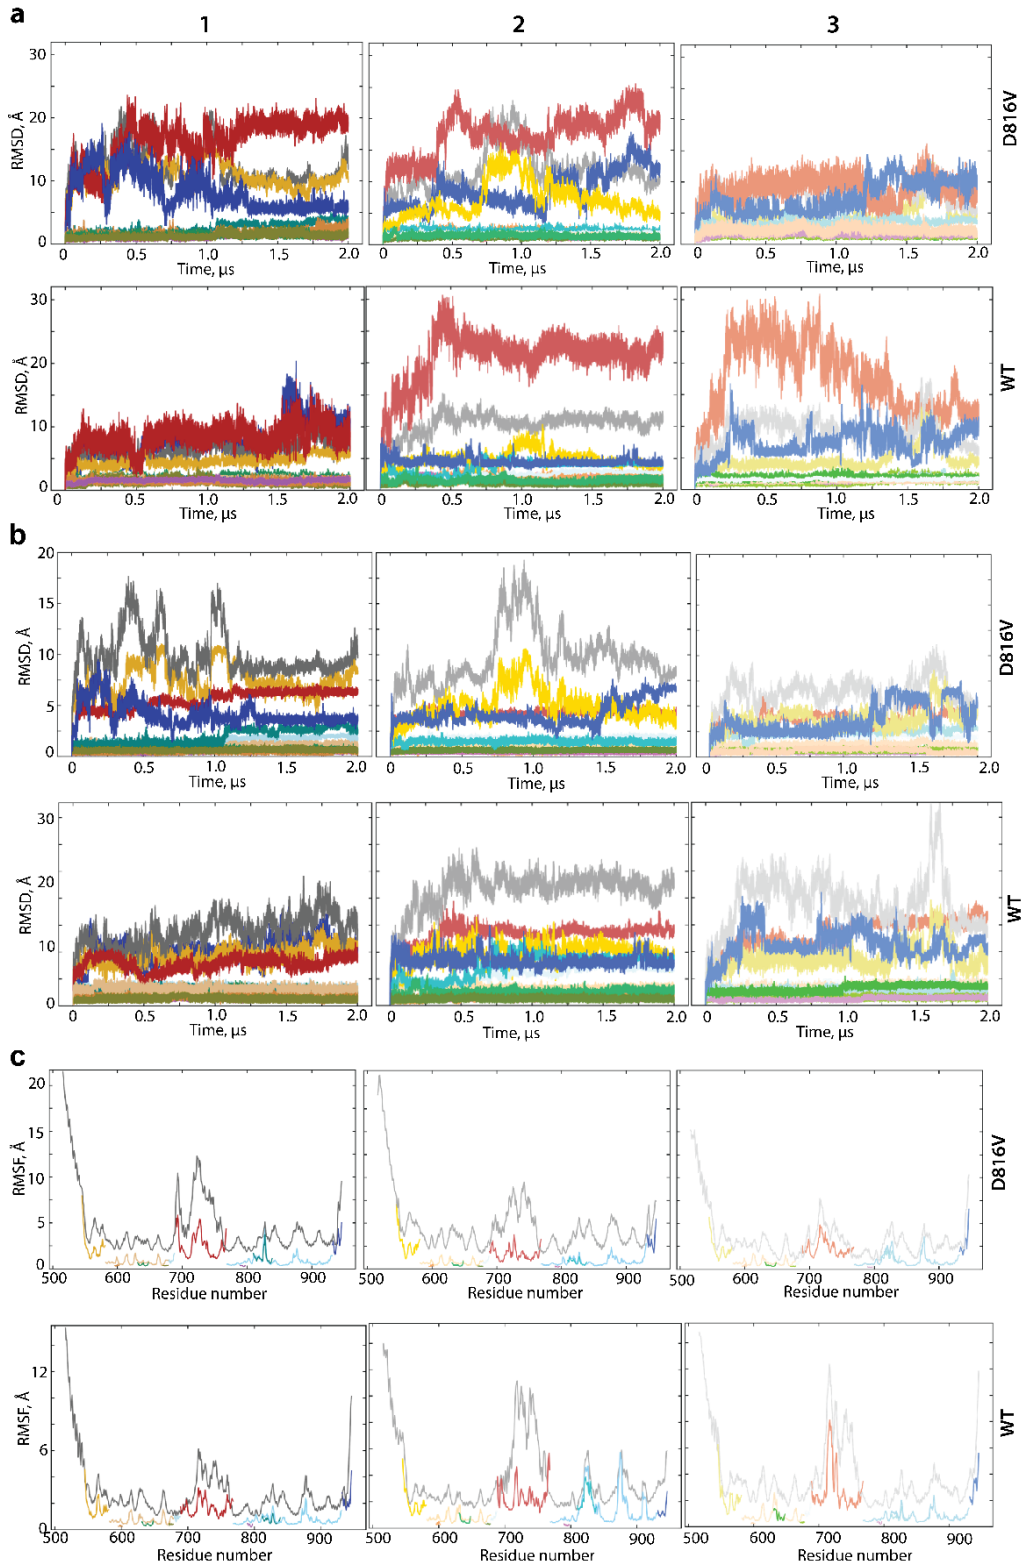

**Figure S2.** Molecular Dynamics (MD) simulations of the full-length cytoplasmic domain of KIT<sup>D816V</sup> and KIT<sup>WT</sup>. (a) RMSDs computed on the C $\alpha$  atoms after fitting on initial conformation (at  $t = 0$  ns) (1-3 replicas, each of 2  $\mu$ s) of kinase domain and each domain/region of KIT<sup>D816V</sup> (a) and KIT<sup>WT</sup> (b). (c) RMSFs computed on the C $\alpha$  atoms for MD conformations after the least-square fitting on the kinase domain initial conformation of KIT<sup>D816V</sup> (top panel) and KIT<sup>WT</sup>. (a-c) KIT is in grey, N-lobe in beige, C-lobe in blue, JMR in yellow, P-loop in orange,  $\alpha$ C-helix in green, hinge in olive, KID in red, C-loop in magenta, A-loop in teal, C-tail in dark blue for the 1-3 trajectories (replicas) of MD simulations. MD replicas 1-3 are distinguished by colour tonality, dark, lighter, and light.

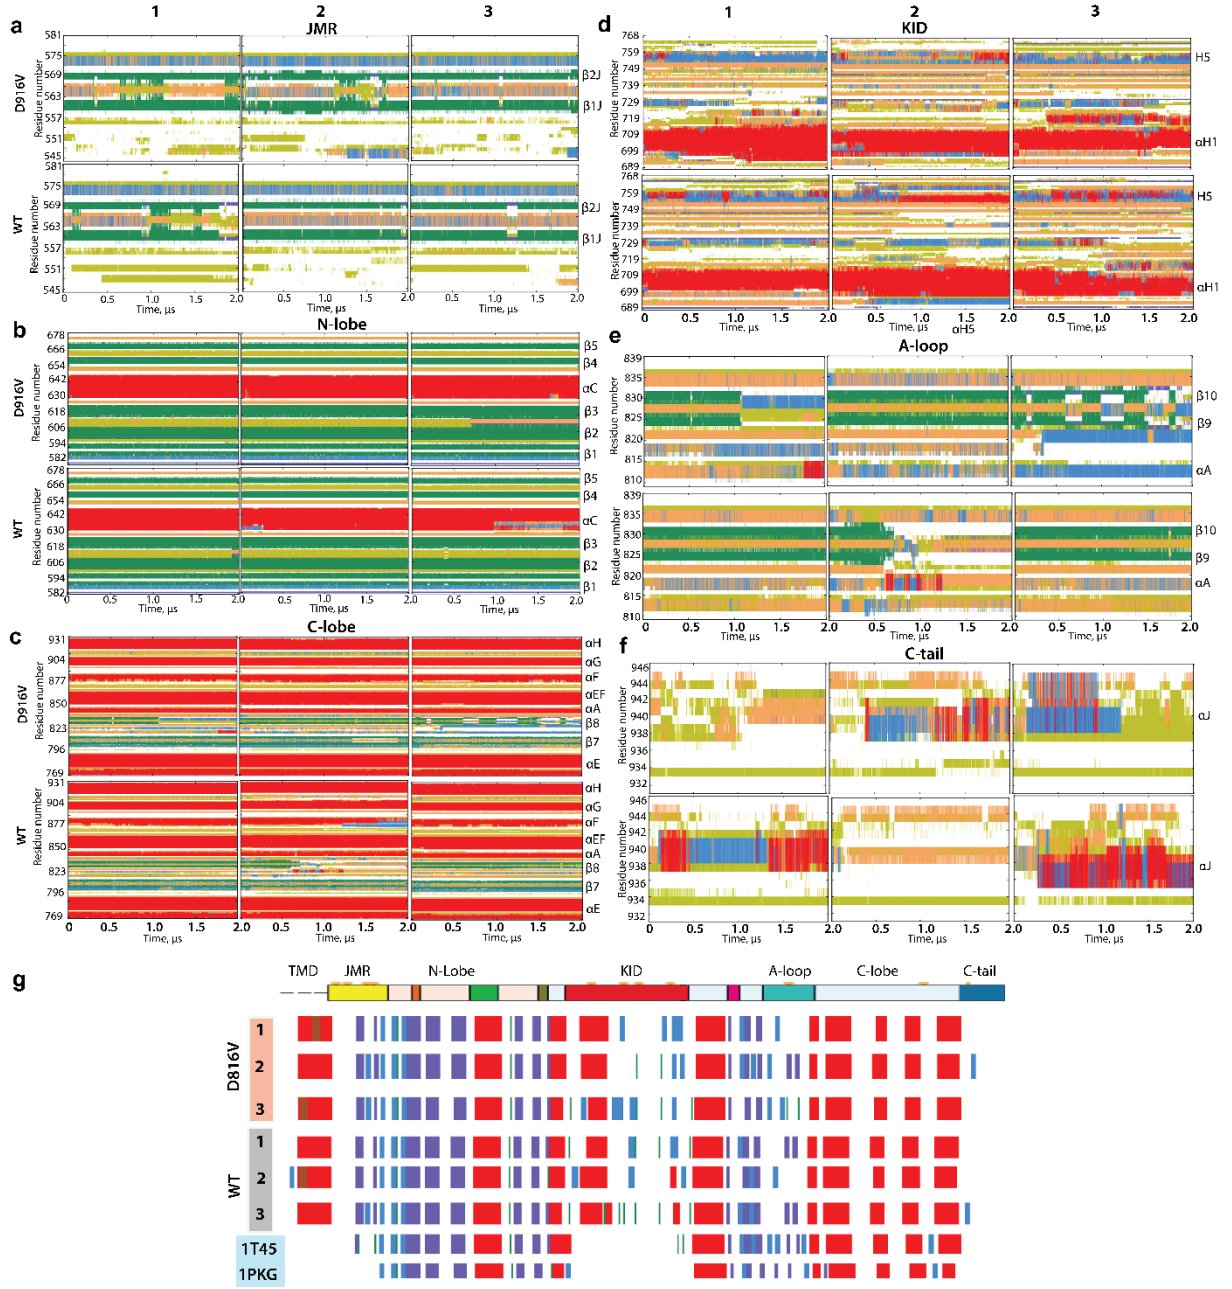

**Figure S3.** Folding of KIT<sup>D816V</sup> (top panels) and KIT<sup>WT</sup> (bottom panels). (a-f) The time-related evolution of the secondary structures of the entire, full-length KIT and per domain/region, as assigned by DSSP: α-helices in red, 3<sub>10</sub>-helices in blue, parallel β strands in green, antiparallel β strands in dark blue, turns in orange, and bends in dark yellow. The three cMD replicas (1–3) were analysed individually. (g) The secondary structures—αH- (red), 3<sub>10</sub>-helices (light blue), and β-strands (dark blue)—assigned for a mean conformation of every MD trajectory (1–3) of KIT<sup>D816V</sup>, KIT<sup>WT</sup> and the crystallographic structures 1T45 (inactive KIT) and 1PKG (active KIT). (D) The secondary structures—αH- (red) and β-strands (dark blue)—assigned on the mean conformation of the concatenated trajectories.

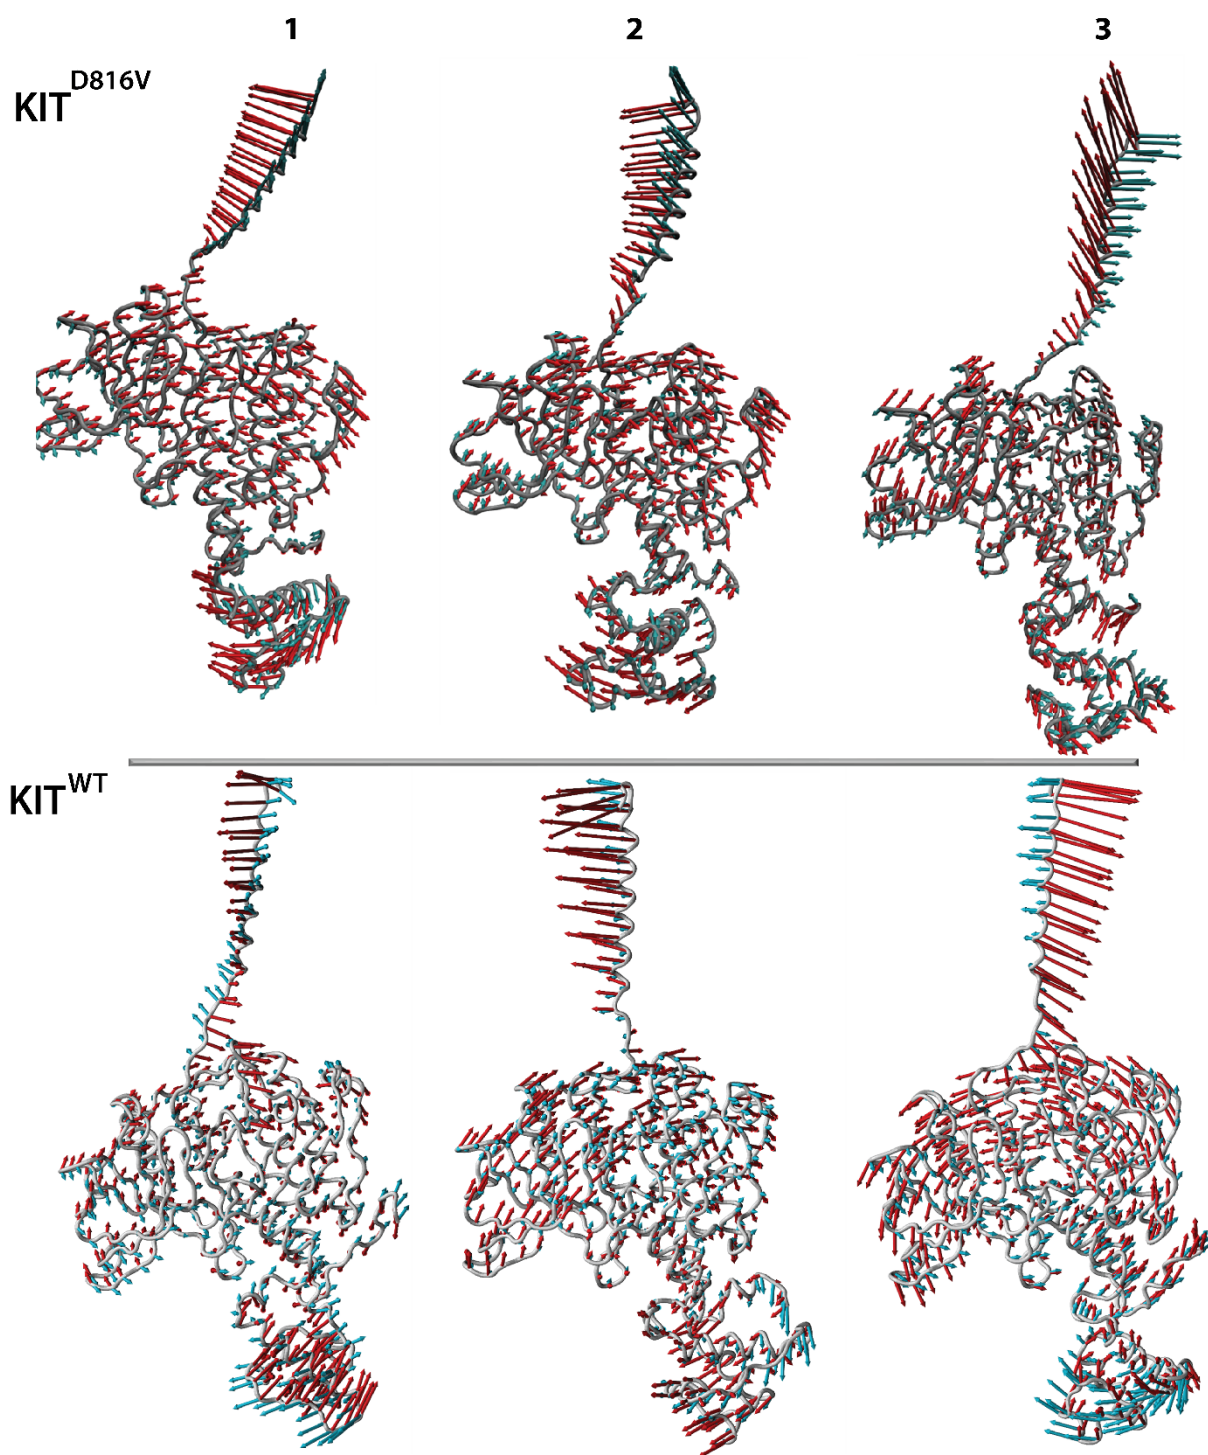

**Figure S4.** PCA of the MD conformations of KIT. Atomic components in PCA modes 1–2 are drawn as red (1<sup>st</sup> mode) and cyan (2<sup>nd</sup> mode) arrows, projected on the cartoon of KIT<sup>D816V</sup> (top) and KIT<sup>WT</sup> (bottom). PCA was performed on each individual trajectory of KIT<sup>D816V</sup> and KIT<sup>WT</sup>. A cut-off distance of 4 Å was used.

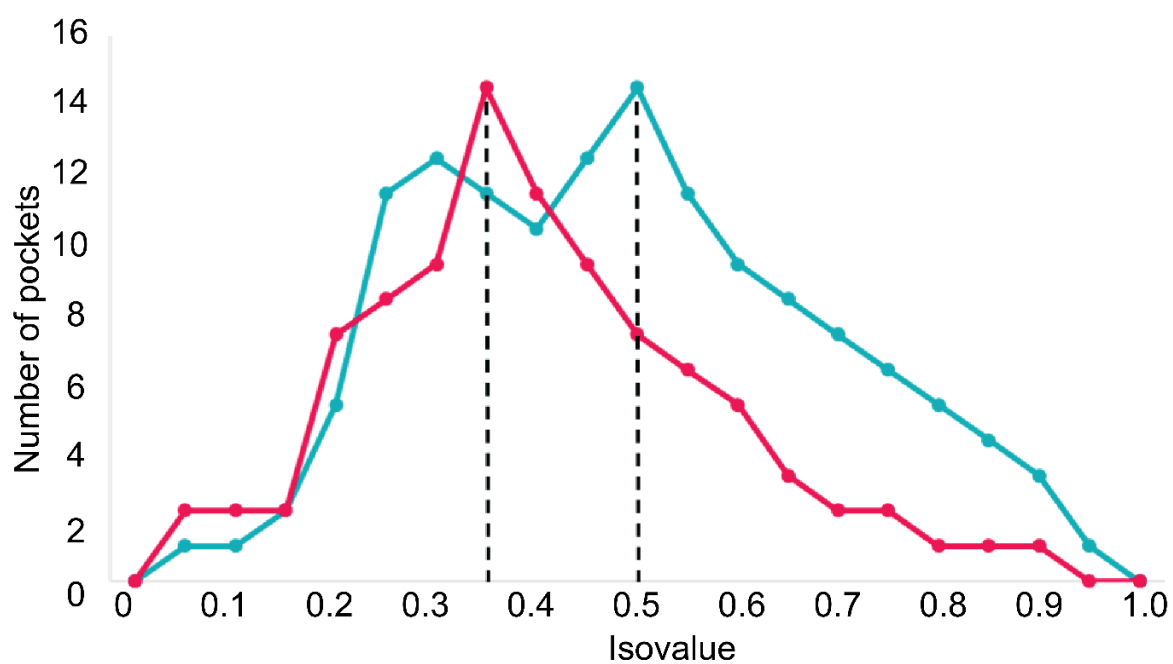

**Figure S5.** Search of the optimal criteria for pockets hunting. This step is carried out using the isovalue from 0 to 1.0 with a step of 0.5 for both proteins. KIT<sup>D816V</sup> and KIT<sup>WT</sup> are in red and cyan respectively.

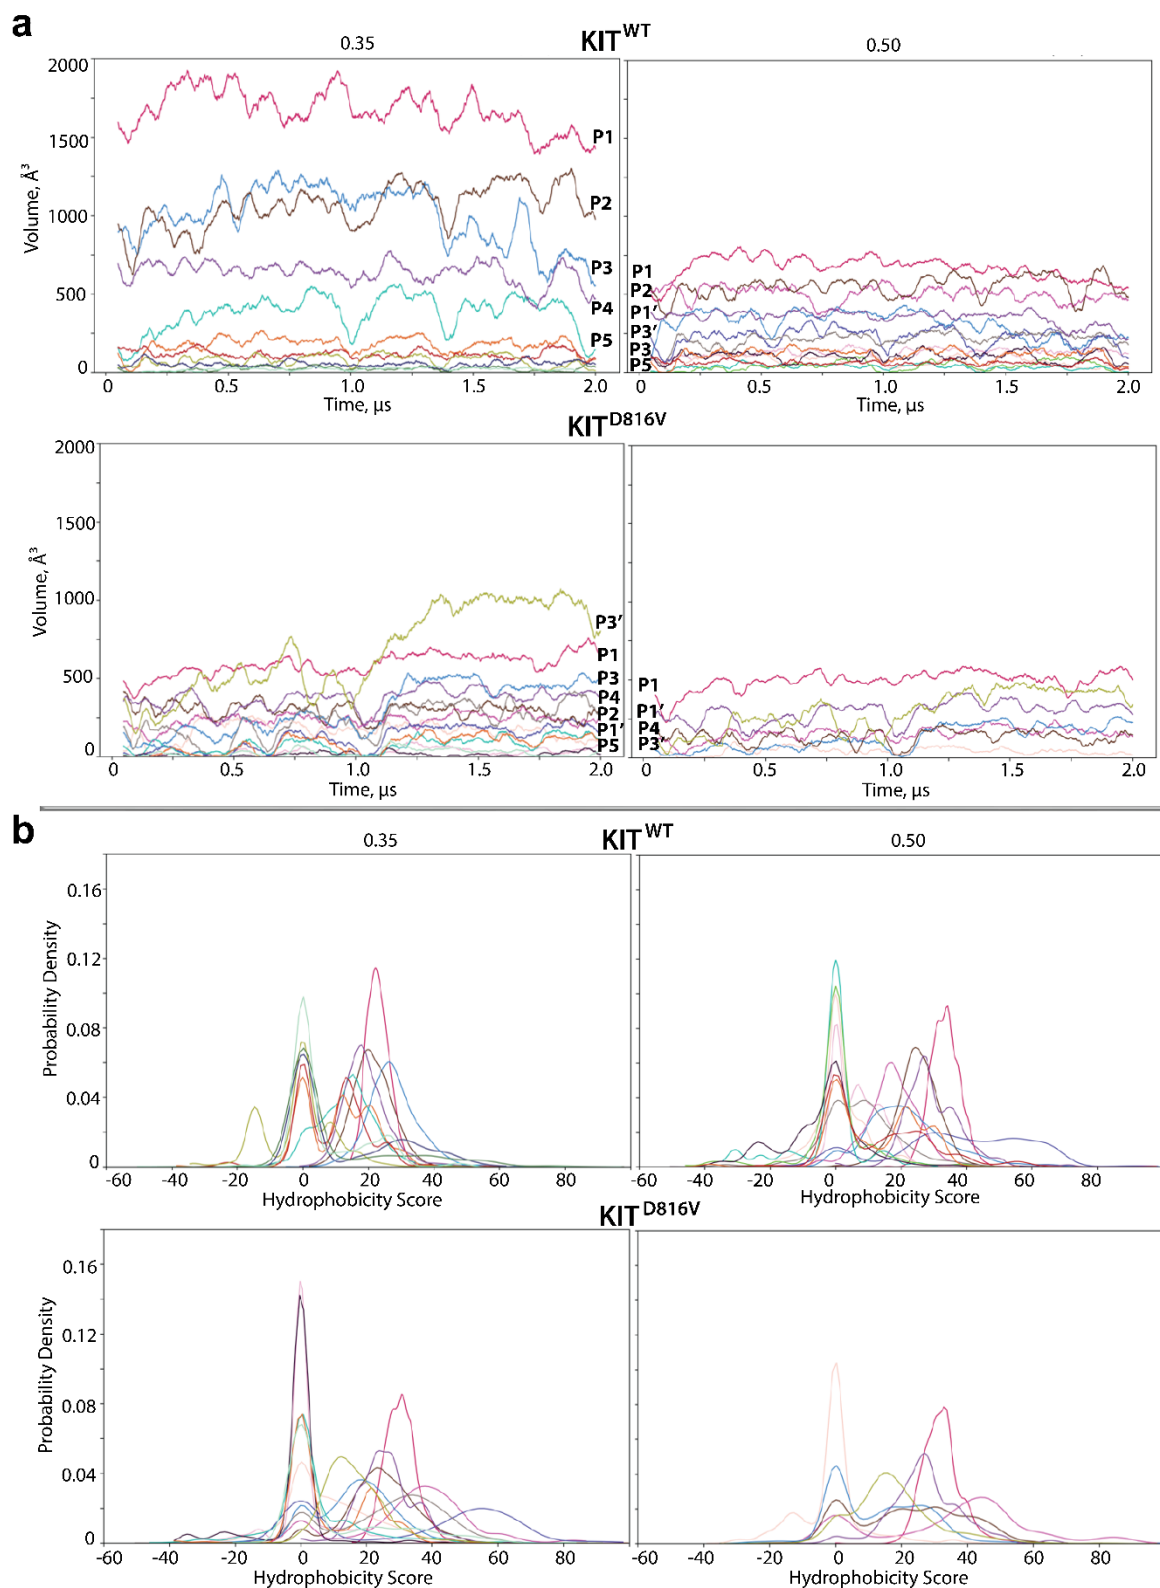

**Figure S6.** The RTK KIT POCKETOME characterisation. **(a)** The pockets evolution over the simulation time in each KIT protein. **(b)** Probability of the pockets hydrophobicity defined as in (Monera *et al.*, 1995). The pockets are distinguished by colour as defined in Figure 8.

**Table S1.** Folding of the intrinsically disordered regions in KIT<sup>WT</sup> and KIT<sup>D816V</sup>

|               | KIT <sup>WT</sup> mean folding (%) |               |               | KIT <sup>D816V</sup> mean folding (%) |              |               |
|---------------|------------------------------------|---------------|---------------|---------------------------------------|--------------|---------------|
|               | Helix                              | Strand        | Total         | Helix                                 | Strand       | Total         |
| <b>JMR</b>    | 13 ± 4                             | 14 ± 0        | 27 ± 4        | 10 ± 4                                | 16 ± 2       | 29 ± 5        |
| <b>KID</b>    | 30 ± 8                             | 3 ± 2         | 33 ± 5        | 32 ± 5                                | 2 ± 2        | 33 ± 7        |
| <b>A-loop</b> | <b>3 ± 3</b>                       | <b>13 ± 9</b> | <b>17 ± 5</b> | <b>13 ± 5</b>                         | <b>9 ± 8</b> | <b>22 ± 9</b> |
| <b>C-tail</b> | 13 ± 9                             | 0             | 13 ± 9        | 15 ± 11                               | 0            | 15 ± 11       |

**Table S2.** Pockets characterisation in KIT<sup>WT</sup> and KIT<sup>D816V</sup>. The numbering of the pocket (P1-P6) is presented as in Figure 8, characterised by the volume size ( $V_{\max}$ , Å<sup>3</sup>), measured in the frame (Frame) and formed by the number of residues (N res). Pockets were characterised by the Fpocket algorithm using isovalue of 0.35.

| KIT <sup>WT</sup> |                             |       |       | KIT <sup>D816V</sup> |                             |       |          |
|-------------------|-----------------------------|-------|-------|----------------------|-----------------------------|-------|----------|
| Pocket            | $V_{\max}$ , Å <sup>3</sup> | Frame | N res | Pocket               | $V_{\max}$ , Å <sup>3</sup> | Frame | N res    |
| <b>P1</b>         | 2674.9                      | 521   | 72    | <b>P1/ P1'/ P1''</b> | 993.7/574.2/218.0           | 1907  | 24/10/11 |
| <b>P2</b>         | 1757.9                      | 1649  | 38    | <b>P2/P2'</b>        | 704.2/652.57                | 1850  | 44/9     |
| <b>P3</b>         | 1818.9                      | 668   | 43    | <b>P3/P3'/P3''</b>   | 216.0/830.7/379.7           | 1199  | 4/25/8   |
| <b>P4</b>         | 873.9                       | 1499  | 20    | <b>P4</b>            | 688.5                       | 1760  | 23       |
| <b>P5</b>         | 1076.9                      | 1511  | 26    | <b>P5</b>            | 382.8                       | 1785  | 5        |
| <b>P6</b>         | 421.4                       | 724   | 11    | <b>P6</b>            | 295.7                       | 744   | 5        |
